# Supplementary material for: Magnetic single-layer nanoribbons of manganese oxide: edge- and width-dependent electronic properties
Source: Royal Society of Chemistry journal article supplement (doi:10.1039/d2tc00333c), 2022-01-01
Supplement: d2tc00333c1.pdf [file d2tc00333c1.pdf]

## SUPPLEMENTARY INFORMATION

### **Magnetic Single Layer Nanoribbons of Manganese Oxide: Edge and Width Dependent Electronic Properties**

Yigit Sozen,<sup>1</sup> Ugur C. Topkiran,<sup>2</sup> and Hasan Sahin<sup>1,\*</sup>

<sup>1</sup>*Department of Photonics, Izmir Institute of Technology, 35430, Izmir, Turkey*

<sup>2</sup>*Department of Physics, Izmir Institute of Technology, 35430, Izmir, Turkey*

## I. SUPPLEMENTARY FIGURES

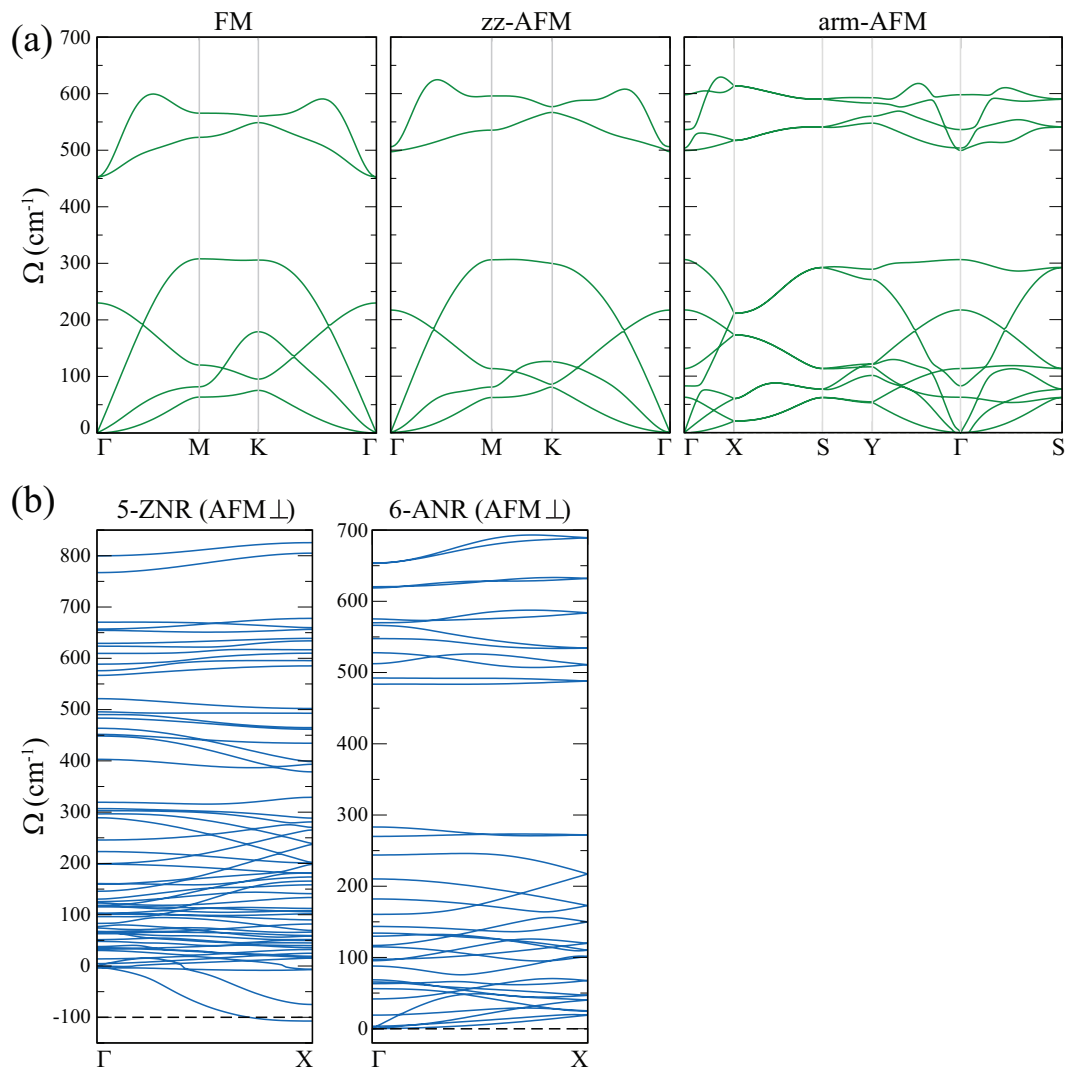

FIG. S1: (a) Calculated phonon band dispersions of FM, zz-AFM, and, arm-AFM ordered MnO single-layer structures, and (b) AFM- $\perp$  ordered 5-ZNR and 6-ANR structures.

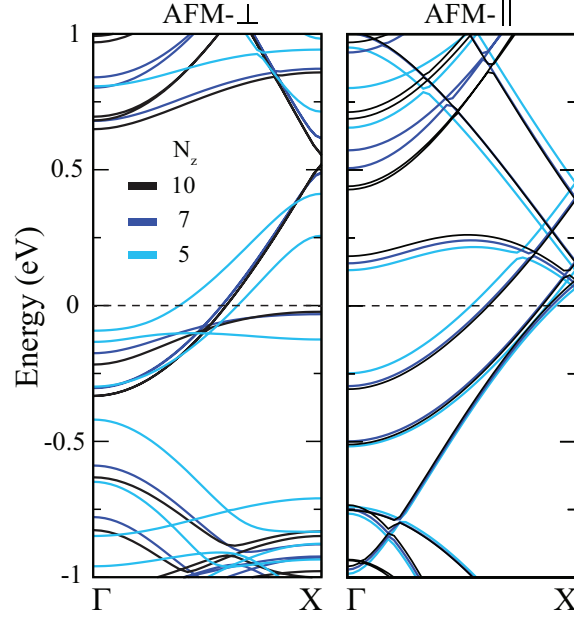

FIG. S2: Calculated electronic band structures of AFM- $\perp$  and AFM- $\parallel$  ordered ZNR structures.

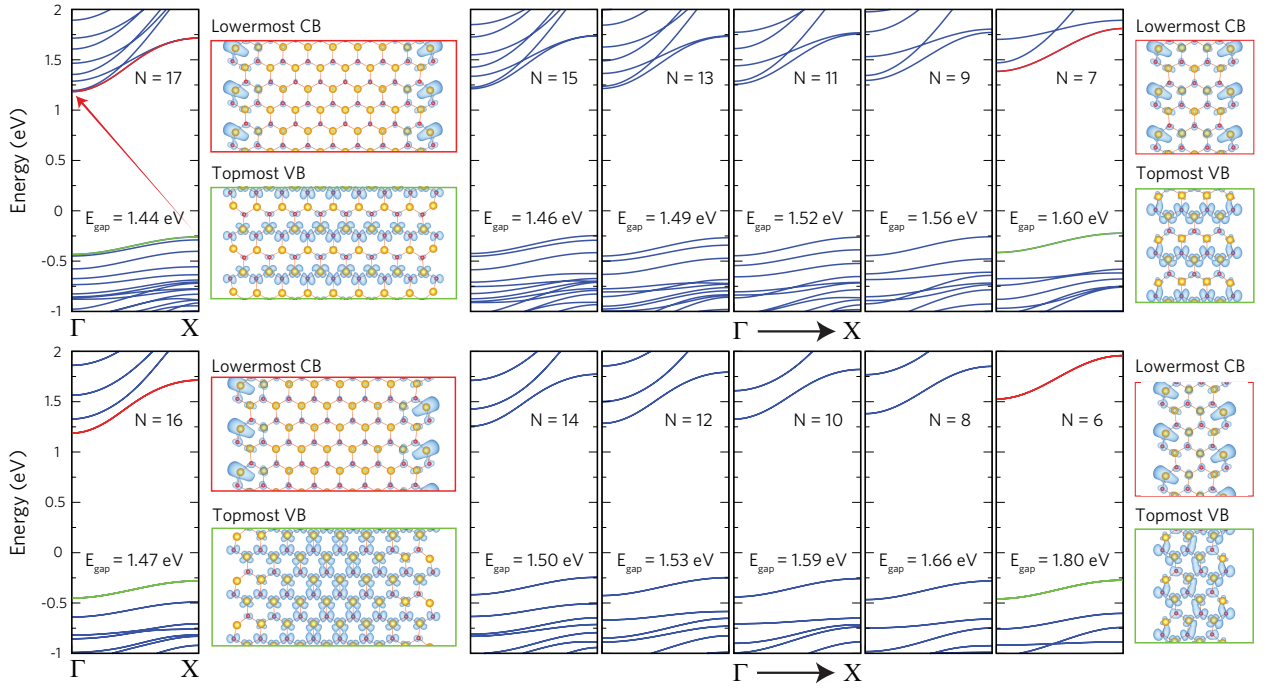

FIG. S3: The evolution of electronic band dispersions with varying ribbon width for AFM- $\perp$  ordered ANRs. Illustrations corresponding to the lowermost CB and topmost VB orbital characteristics are given for 17- 16- 7- and 6-ANR structures.

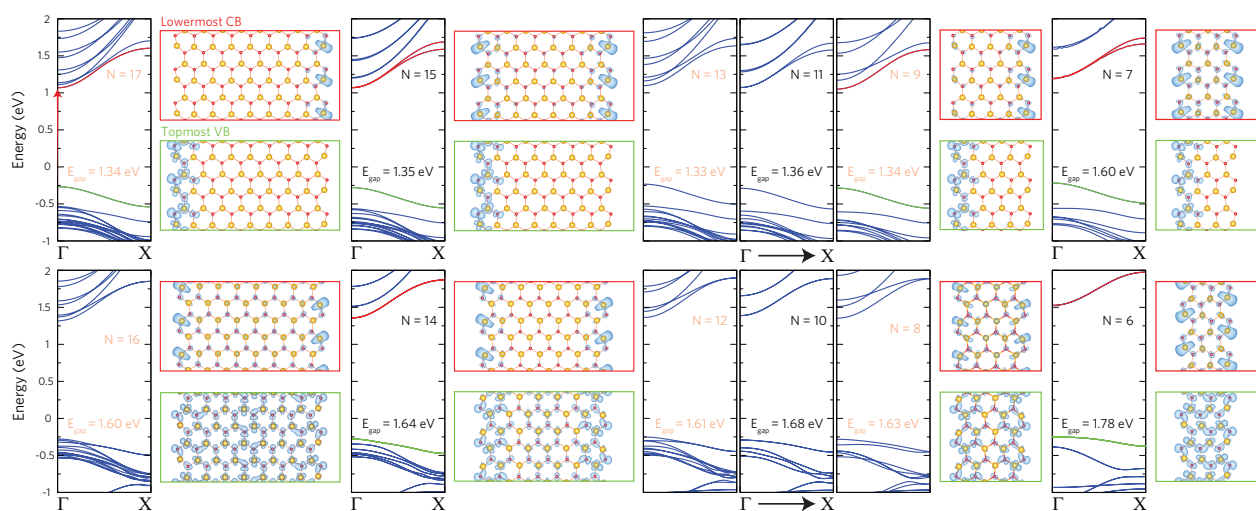

FIG. S4: The evolution of electronic band dispersions with varying ribbon width for AFM-|| ordered ANRs. Illustrations correspond to the orbital characteristics of lowermost CB and topmost VB with respect to the specific ribbon widths.

---

\* Electronic address: [hasansahin@iyte.edu.tr](mailto:hasansahin@iyte.edu.tr)
